# Supplementary material for: A redox reaction-induced ratiometric fluorescence platform for the specific detection of ascorbic acid based on Ag2S quantum dots and multifunctional CoOOH nanoflakes
Source: Royal Society of Chemistry journal article supplement (doi:10.1039/d2tb02438a), 2023-01-01
Supplement: d2tb02438a1.pdf [file d2tb02438a1.pdf]

Supplementary information

**Redox Reaction Induced Ratiometric Fluorescence Platform for the Specific Detection  
of Ascorbic Acid Based on Ag<sub>2</sub>S Quantum Dots and Multifunctional CoOOH  
Nanoflakes**

Haoyu Chen, Zifu Cai, Jialing Gui, Ying Tang, Peng Yin, Xiaohua Zhu, Youyu Zhang, Haitao Li,  
Meiling Liu\*, Shouzhuo Yao

*Key Laboratory of Chemical Biology & Traditional Chinese Medicine Research (Ministry of Education,  
China), College of Chemistry and Chemical Engineering, Hunan Normal University, Changsha  
410081, PR China*

\* Corresponding author:

Email: [liumeilingww@126.com](mailto:liumeilingww@126.com), [liuml@hunnu.edu.cn](mailto:liuml@hunnu.edu.cn)

## Contents

|                                                                                                     |    |
|-----------------------------------------------------------------------------------------------------|----|
| S1: Synthesis of CoOOH .....                                                                        | 3  |
| S2: The kinetic of the OXD-like activity .....                                                      | 4  |
| S3: Synthesis of Ag <sub>2</sub> S QDs.....                                                         | 5  |
| S4: Quantum yield measurements .....                                                                | 6  |
| Figure S1. The optimization and kinetics of OXD-like activity .....                                 | 7  |
| Figure S2. Fluorescence emission spectra of OPD, OPD + Co <sup>2+</sup> , and OPD + CoOOH NFs. .... | 8  |
| Figure S3: Steady-state kinetic assay of Ag <sub>2</sub> S-CoOOH. ....                              | 9  |
| Figure S4: The mechanism study in detection of AA.....                                              | 10 |
| Figure S5: The influence of ionic strength toward Ag <sub>2</sub> S-CoOOH. ....                     | 11 |
| Figure S6: The XPS spectra of Ag in Ag <sub>2</sub> S-CoOOH and Ag <sub>2</sub> S-CoOOH-AA. ....    | 12 |
| Figure S7. Optimization the detection of AA. ....                                                   | 13 |
| Table S1. Comparison of steady-state kinetic parameter of CoOOH and other nanozymes. ....           | 14 |
| Table S2. Determination of the concentrations of AA in real samples. ....                           | 15 |

### **S1: Synthesis of CoOOH**

The CoOOH was obtained by mixing 1.5 mL NaOH solution (1.0 M) with 50 mL CoCl<sub>2</sub> solution (10 mM), ultrasonic treatment for 5 min, centrifugation at 4000 rpm/min for 20 min, and then dispersed in 50 mL Milli-Q water. After that, 3 mL NaClO was added and an ultrasound was performed for 20 min. The obtained CoOOH NFs solution was centrifuged at 12000 rpm/min for 10 min and washed with water three times. Finally, the solution was dispersed in 50 mL Milli-Q water.

## **S2: The kinetic of the OXD-like activity**

Various concentrations of TMB were added into acetate buffer with a fixed concentration of CoOOH NFs. When studying the Michaelis-Menten curves of TMB with different concentrations, the absorbance at 650 nm was measured. The  $V_{\max}$  and  $K_m$  values were calculated using the Michaelis equation:  $V = V_{\max} [S]/(K_m + [S])$ . Here,  $V_{\max}$ ,  $K_m$ ,  $V$ , and  $[S]$  represent the maximum reaction rate, the Michaelis Menten constant, the initial reaction rate, and the concentration of the substrate, respectively.

### **S3: Synthesis of Ag<sub>2</sub>S QDs**

In a typical procedure, 0.0191 g DPA and 0.0272 g AgNO<sub>3</sub> were added into 40 mL of Milli-Q water. After stirring for 20 min, the uniform mixture was heated in the microwave oven at low temperature for 10 min. The color of the solution changed from colorless to light yellow and then to reddish brown. The Ag<sub>2</sub>S QDs was filtered by a 0.22 μm ultrafiltration membrane and stored at 4 °C for further use.

#### S4: Quantum yield measurements

The QY of the as-prepared Ag<sub>2</sub>S QDs was obtained using quinine sulfate in 0.1 M H<sub>2</sub>SO<sub>4</sub> aqueous solution as the standard (quantum yield is 0.54)<sup>1</sup>. The highly diluted samples with the absorbances less than 0.05 (highly diluted samples can minimize the second optical processes such as re-absorption and re-emission effects) at the excitation wavelength were recorded, respectively. And the integrated fluorescence intensity was plotted against absorbance at the excitation wavelength and fitted into a linear function to obtain the slope. According to the two slopes (one obtained from the standard is called  $k_{std}$  and the other from the sample is called  $k_{sample}$ ), the QY of Ag<sub>2</sub>S QDs was calculated as 0.5% from eq. (2)<sup>2</sup>:

$$\Phi_{sample} = \frac{k_{sample}}{k_{std}} \times \frac{\eta_{sample}^2}{\eta_{std}^2} \times \Phi_{std} \quad (2)$$

where  $\Phi_{std}$  is the QY of the standard,  $k_{sample}$  and  $k_{std}$  are the slopes determined by the curves of Ag<sub>2</sub>S QDs and standard, respectively.  $\eta_{sample}$  and  $\eta_{std}$  are the refractive indices of the sample and reference standard.

**Figure S1. The optimization and kinetics of OXD-like activity**

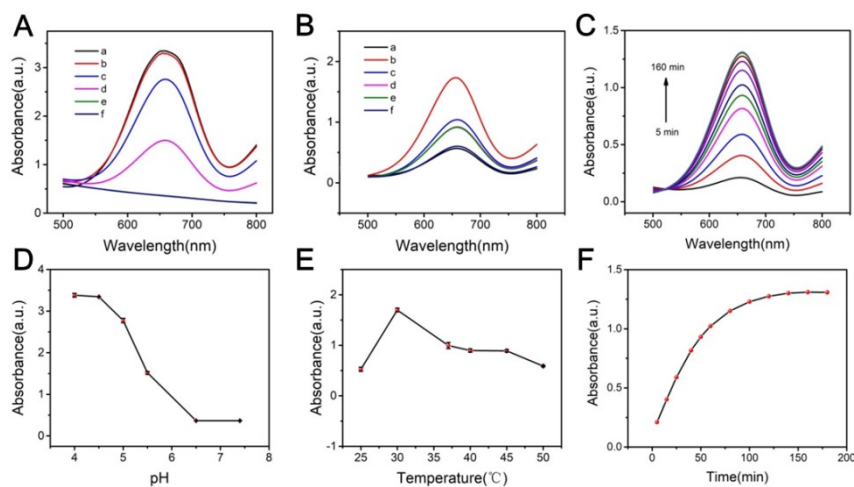

Figure S1. UV-vis absorption spectra of TMB + CoOOH NFs solution (A) at different pH of (a) 4.0, (b) 4.5, (c) 5.0 (d), 5.5, (e) 6.5 and (f) 7.4; (B) at different temperature (a) 25 °C, (b) 30 °C, (c) 37 °C, (d) 40 °C, (e) 45 °C and (f) 50 °C. (C) at different time. Optimization the OXD activity of (D) pH, (E) temperature, (F) reaction time.

**Figure S2. Fluorescence emission spectra of OPD, OPD + Co<sup>2+</sup>, and OPD + CoOOH NFs.**

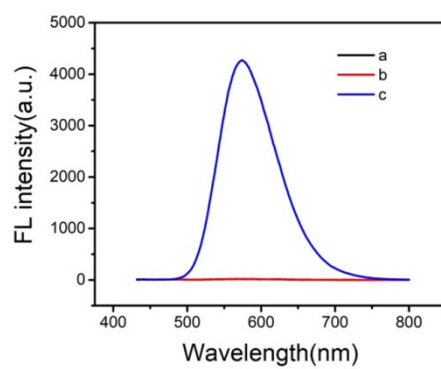

Figure S2. Fluorescence emission spectra of (a) OPD, (b) OPD + Co<sup>2+</sup>, (c) OPD + CoOOH NFs.

**Figure S3: Steady-state kinetic assay of  $\text{Ag}_2\text{S-CoOOH}$ .**

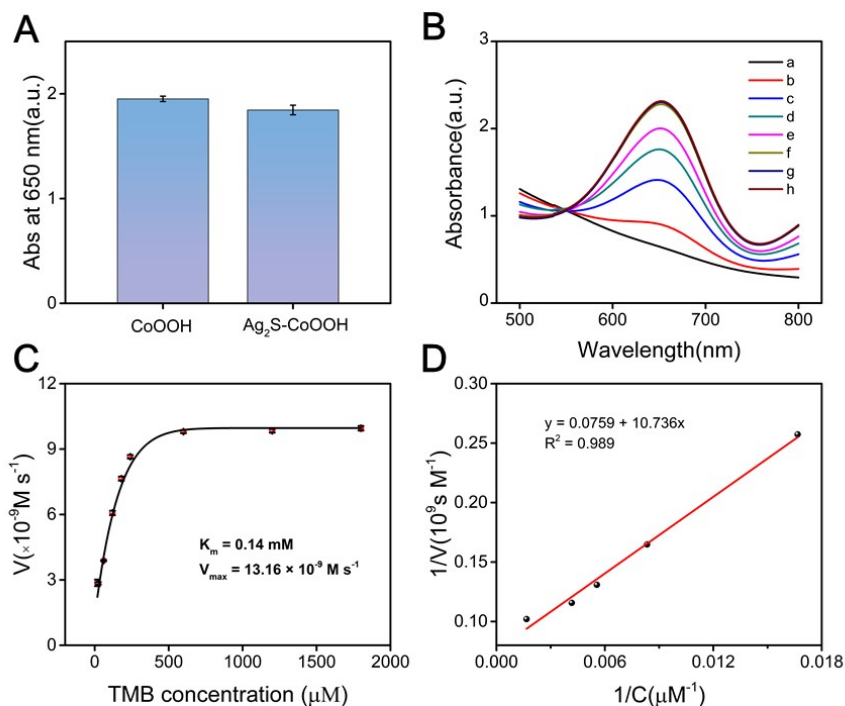

Figure S3. (A) The UV-vis absorbance of TMB treated with  $\text{CoOOH}$  and  $\text{Ag}_2\text{S-CoOOH}$ ; (B) TMB +  $\text{CoOOH}$  NFs at different TMB concentrations: (a) 24  $\mu\text{M}$ , (b) 60  $\mu\text{M}$ , (c) 120  $\mu\text{M}$ , (d) 180  $\mu\text{M}$ , (e) 240  $\mu\text{M}$ , (f) 0.6 mM, (g) 1.2 mM and (h) 1.8 mM; (C) Steady-state kinetic assay and oxidase-like activity catalytic mechanism at different TMB concentrations. Inset: The calculated  $K_m$  and  $V_{\text{max}}$  values; (D) Corresponding double reciprocal plots.

**Figure S4: The mechanism study in detection of AA.**

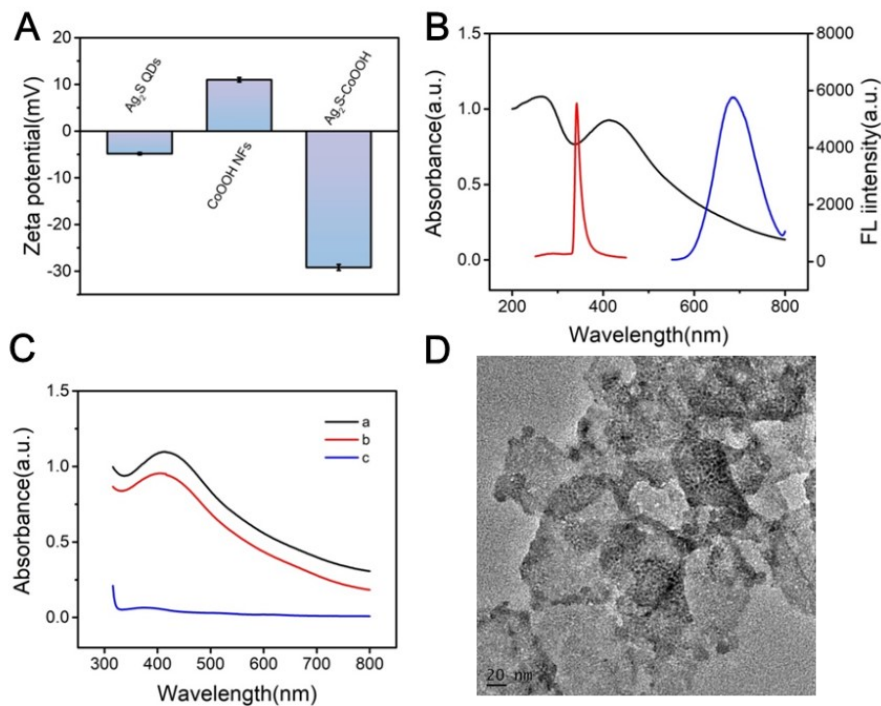

Figure S4. (A) Zeta potentials of Ag<sub>2</sub>S QDs, CoOOH NFs and Ag<sub>2</sub>S-CoOOH; (B) UV-vis absorption spectrum of CoOOH NFs (black curve) and fluorescence emission spectra (blue curve) and the excitation spectra (red curve) of Ag<sub>2</sub>S QDs; (C) UV-vis absorption spectra of CoOOH nanoflakes (a), CoOOH + GSH (b) and CoOOH + AA (c). (D) TEM image of Ag<sub>2</sub>S-CoOOH-GSH.

**Figure S5: The influence of ionic strength toward  $\text{Ag}_2\text{S-CoOOH}$ .**

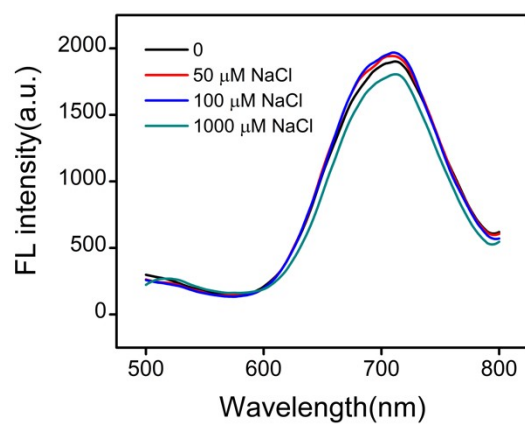

Figure S5. Fluorescence emission spectra of  $\text{Ag}_2\text{S-CoOOH}$  with the addition of different concentrations of NaCl.

**Figure S6: The XPS spectra of Ag in Ag<sub>2</sub>S-CoOOH and Ag<sub>2</sub>S-CoOOH-AA.**

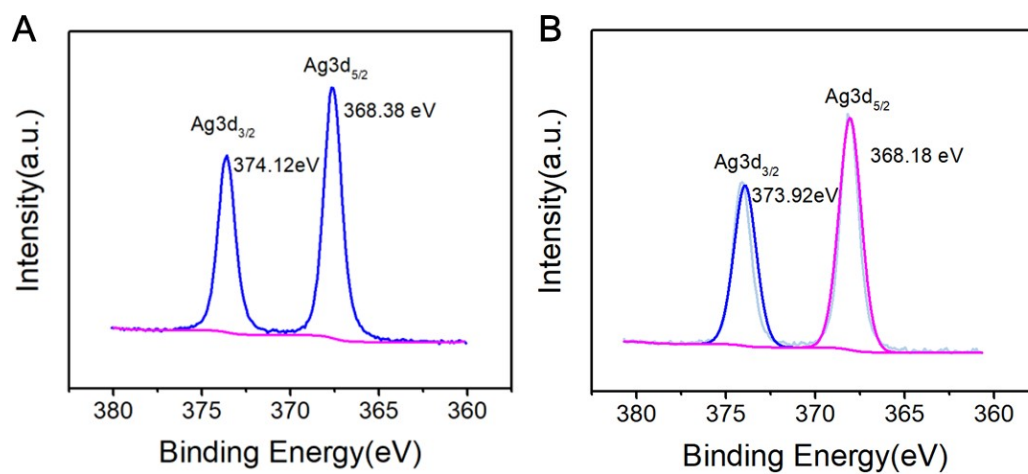

Figure S6. The corresponding XPS spectra of Ag in Ag<sub>2</sub>S-CoOOH in the absence (A) and presence (B) of AA.

**Figure S7. Optimization the detection of AA.**

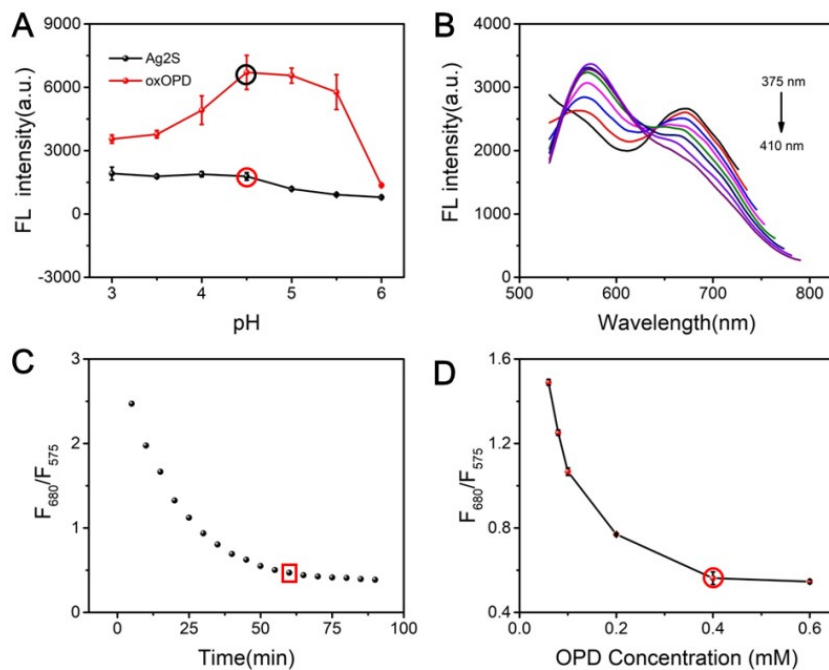

Figure S7. Fluorescence intensity of Ag<sub>2</sub>S-CoOOH-OPD under different pH (A) and different excitation wavelengths (B); Ratiometric fluorescence change under different incubating time (C) and different concentration of OPD (D).

**Table S1. Comparison of steady-state kinetic parameter of CoOOH and other nanozymes.**

| Catalyst             | $K_m$ (mM) | $V_{max}$ ( $10^{-8}$ M s $^{-1}$ ) | Ref       |
|----------------------|------------|-------------------------------------|-----------|
| CeO <sub>2</sub> NPs | 0.80       | 30                                  | 3         |
| Co–Fe LDH            | 0.218      | /                                   | 4         |
| POM@CuO NPs          | 1.084      | 2.72                                | 5         |
| Pt NPs               | 0.63       | /                                   | 6         |
| CoOOH                | 0.1        | 0.198                               | This work |

**Table S2. Determination of the concentrations of AA in real samples.**

| Sample      | Found ( $\mu\text{M}$ ) | Added ( $\mu\text{M}$ ) | Detected ( $\mu\text{M}$ ) | Recovery (%) | RSD (%) |
|-------------|-------------------------|-------------------------|----------------------------|--------------|---------|
| lime juice  | 2.3                     | 10.0                    | 12.1                       | 98.0         | 4.3     |
|             |                         | 100.0                   | 107.1                      | 104.8        | 8.7     |
|             |                         | 1000.0                  | 970.6                      | 96.8         | 3.2     |
| human serum | 0.9                     | 10.0                    | 12.2                       | 111.7        | 6.4     |
|             |                         | 100.0                   | 115.6                      | 113.9        | 5.2     |
|             |                         | 1000.0                  | 993.6                      | 99.2         | 3.7     |

## Reference

1. G. Yin, Y. Gan, H. Jiang, T. Yu, M. Liu, Y. Zhang, H. Li, P. Yin and S. Yao, *Anal Chem*, 2021, **93**, 9878-9886.
2. H. El-Kashef, *Physica B: Condensed Matter*, 2000, **279**, 295-301.
3. A. Asati, S. Santra, C. Kaittanis, S. Nath and J. M. Perez, *Angew. Chem. Int. Ed. Engl.* 2009, **48**, 2308-2312.
4. J. Zhao, Y. Xie, W. Yuan, D. Li, S. Liu, B. Zheng and W. Hou, *J Mater. Chem. B* 2013, **1**, 1263-1269.
5. Y. Xu, P. Li, X. Hu, H. Chen, Y. Tang, Y. Zhu, X. Zhu, Y. Zhang, M. Liu and S. Yao, *ACS Appl. Nano Mater.* 2021, **4**, 8302-8313.
6. C. J. Yu, T. H. Chen, J. Y. Jiang and W. L. Tseng, *Nanoscale*, 2014, **6**, 9618-9624.
